# Supplementary material for: Identification of the endoplasmic reticulum localization sequence and N-glycosylation of matrix metalloproteinase 26
Source: PubMed Central journal article supplement — RSC Adv. 2019 Jul 25;9(40):23053–60. doi: 10.1039/c9ra05222d (PMC9067285; doi:10.1039/c9ra05222d), 2019-07-25
Supplement: RA-009-C9RA05222D-s001.pdf [file RA-009-C9RA05222D-s001.pdf]

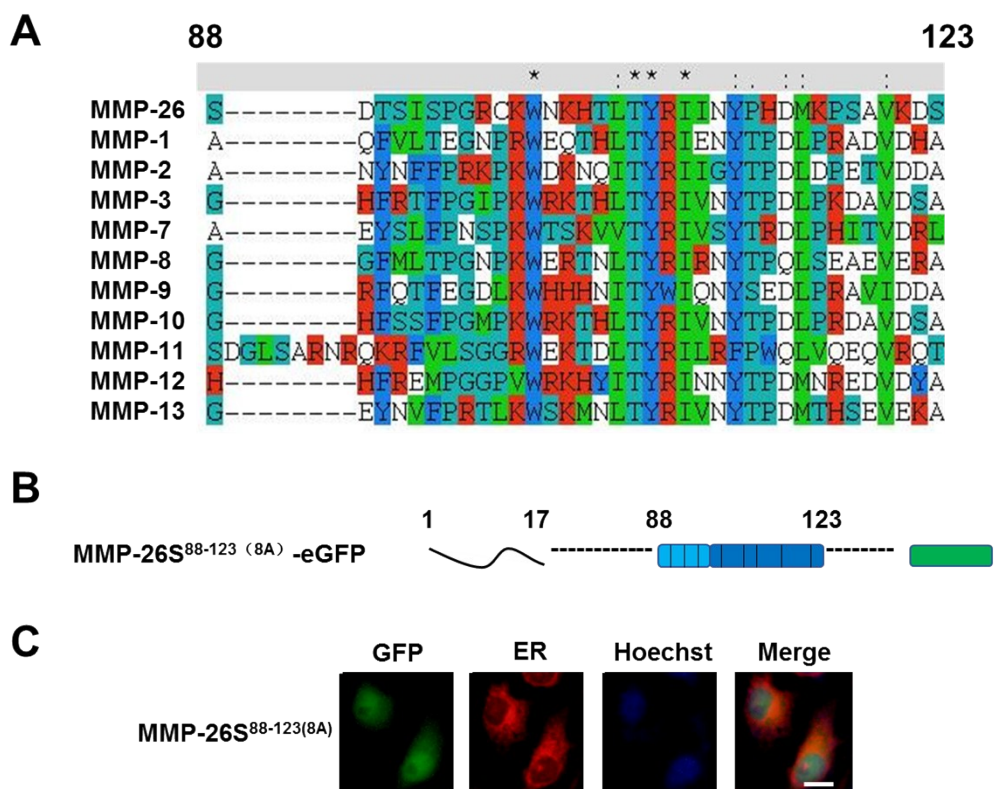

Figure. S1 Positively charged residues in the 88–123 region are vital for the ER retention of MMP-26. (A) Multi-sequence alignment of all secreted MMPs. Positively charged residues are coloured in red. Symbols denote the degree of conservation observed in each column: “\*” (identical residues in all sequences), “:” (highly conserved column), and “.” (weakly conserved column). (B) Schematic of MMP-26S<sup>88–123</sup> (8A)-GFP. (C) HeLa cells were transfected with plasmid of MMP-26S<sup>88–123</sup> (8A)-GFP, ER-Tracker Red was added into cell culture media after 24 h and nuclei were co-stained with Hoechst. The scale bar is 10  $\mu$ m.

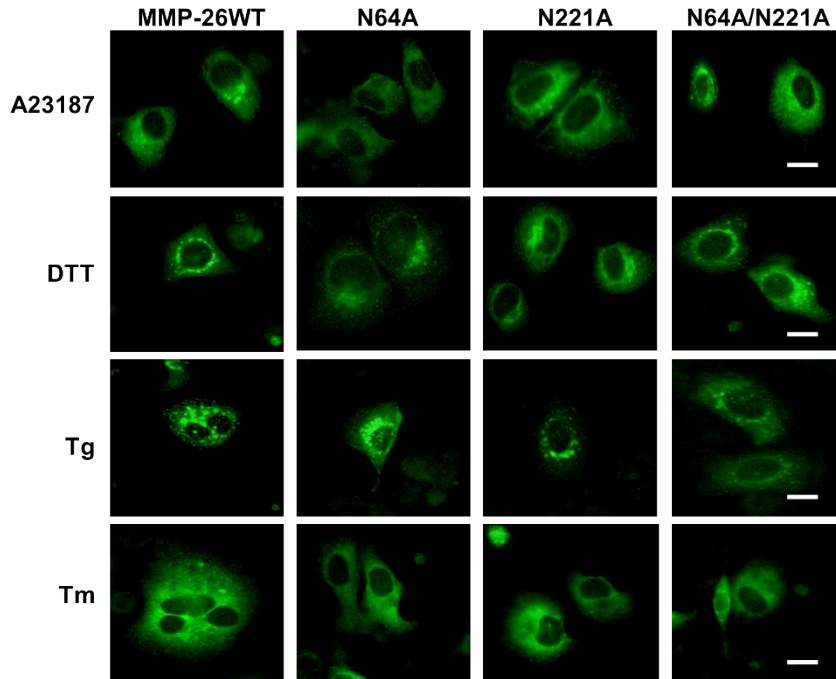

Figure. S2 Subcellular localization of MMP-26-GFP and its N-glycosylation deficient mutants under ER stress. HeLa cells were transfected with plasmids of MMP-26 and its N-glycosylation-deficient mutants (N64A, N221A, N64A/N221A). After 24 h transfection, A23187 (1  $\mu\text{mol/L}$ ), DTT (200  $\mu\text{mol/L}$ ), Tg (2  $\mu\text{mol/L}$ ), and Tm (5  $\mu\text{g/L}$ ) were added to the cell culture media. The scale bar is 10  $\mu\text{m}$ .

#### Primers design

|                        |            |                                        |
|------------------------|------------|----------------------------------------|
| MMP-26(signal peptide) | SP-for     | CCAAGCTTATGCAGCTCGTCATCTTAAGAGTTA      |
|                        | SP-rev     | TCGGAGGCGAAACACCAGGGCAAGA              |
| MMP-26(87-125)         | 87-125-for | TCGCCGGGTCCGACACCTCCATCT               |
|                        | 87-125-rev | GGGTACCAATATATATACTGTCTTTCACTGCGGATGGC |
| MMP-26(88-125)         | 88-125-for | TCGCCTCCGACACCTCCATCTCGCCAG            |
|                        | 88-125-rev | GGGTACCAATATATATACTGTCTTTCACTGCGGATGGC |
| MMP-26(89-125)         | 89-125-for | TCGCCGACACCTCCATCTCGCCAG               |

|                        |                     |                                                |
|------------------------|---------------------|------------------------------------------------|
|                        | 89-125-rev          | GGGTACCAATATATATACTGTCTTTCACTGCGGATGGC         |
| MMP-26(90-125)         | 90-125-for          | TCGCCACCTCCATCTCGCCAG                          |
|                        | 90-125-rev          | GGGTACCAATATATATACTGTCTTTCACTGCGGATGGC         |
| MMP-26(88-124)         | 88-124-for          | TCGCCTCCGACACCTCCATCTCGCCAG                    |
|                        | 88-124-rev          | GGGTACCAATTATACTGTCTTTCACTGCGGATGGC            |
| MMP-26(88-123)         | 88-123-for          | TCGCCTCCGACACCTCCATCTCGCCAG                    |
|                        | 88-123-rev          | GGGTACCAATACTGTCTTTCACTGCGGATGGC               |
| MMP-26(88-122)         | 88-122-for          | TCGCCTCCGACACCTCCATCTCGCCAG                    |
|                        | 88-122-rev          | GGGTACCAATGTCTTTCACTGCGGATGGC                  |
| MMP-26(88-121)         | 88-121-for          | TCGCCTCCGACACCTCCATCTCGCCAG                    |
|                        | 88-121-rev          | GGGTACCAATTTTCACTGCGGATGGC                     |
| MMP-26 $\Delta$ 88-123 | 1-87-for            | CCAAGCTTATGCAGCTCGTCATCTTAAGAGTTA              |
|                        | 1-87-rev            | CATTATATATCCCATCAGGCACCCACAGT                  |
|                        | 124-261-for         | GTGCCTGATGGGATATATAATGCAGTTTCCATCTGGAGCAA<br>T |
|                        | 124-261-rev         | GGGTACCAATAGGTATGTCAGATGAACATTTTTCTCCATAC      |
| MMP-26S88-123<br>(8A)  | R96A-for            | CTCCATCTCGCCAGGAGCATGCAAGTGGAA                 |
|                        | R96A-rev            | TGCTCCTGGCGAGATGGAGGTGTCGGAGGC                 |
|                        | K98A-for            | TCGCCAGGAAGATGCGCTTGAATAAGCAC                  |
|                        | K98A-rev            | GTGCTTATTCCAAGCGCATCTTCTGGCGA                  |
|                        | K101A-for           | TGCAAGTGAATGCTCACACTCTAACTTAC                  |
|                        | K101A-rev           | AAGTTAGAGTGTGTGCATTCCACTTGCATC                 |
|                        | H102A-for           | ATGCAAGTGAATAAAGGCCACTCTAACTTA                 |
|                        | H102A-rev           | GGCCTTATTCCACTTGCATCTTCTGGCGA                  |
|                        | R107A-for           | ACACTCTAACTTACGCTATTATCAATTACC                 |
|                        | R107A-rev           | GGTAATTGATAATTGCGTAAGTTAGAGTGT                 |
|                        | H113A-for           | TTATCAATTACCCAGCTGATATGAAGCCAT                 |
|                        | H113A-rev           | ATGGCTTCATATCTGCTGGGTAATTGATAA                 |
|                        | K116A-for           | TTACCCACATGATATGGCGCCATCCGCAGT                 |
|                        | K116A-rev           | CGCCATATCATGTGGGTAATTGATAATCCT                 |
|                        | K121A-for           | GAAGCCATCCGCAGTGGCAGACAGTATTGG                 |
|                        | K121A-rev           | TGCCACTGCGGATGGCTTCATATCATGTGG                 |
| Mut-MMP-7              | MMP-7-for           | TCAGATCTCGAGCTCAATGCGACTCACCGTGCTGT            |
|                        | MMP-7(92)-rev       | GGAGGTGTCGGAAACATCTGGCACTCCACATC               |
|                        | MMP-7(129)-for      | GCAGTGAAAGACAGTGTGTCAAAGGCTTTAAACATGTG         |
|                        | MMP-7-rev           | CCGGGCCCGCGGTACTTTCTTTCTTGAATTACTTCGTTT        |
|                        | MMP-26(88)-for      | GGAGTGCCAGATGTTTCCGACACCTCCATCTCGC             |
|                        | MMP-26(123)-<br>rev | TAAAGCCTTTGACACACTGTCTTTCACTGCG                |
